# Supplementary material for: The Structural and Electronic Properties of the Ag5 Atomic Quantum Cluster Interacting with CO2, CH4, and H2O Molecules
Source: MDPI journal article supplement (doi:10.3390/cryst13121691), 2023-12-15
Supplement: s1 [file s1]

**Structural and Electronic Properties of  $\text{Ag}_5$  Atomic Quantum  
Cluster Interacting with  $\text{CO}_2$ ,  $\text{CH}_4$ , and  $\text{H}_2\text{O}$  Molecules**

**Moteb Alotaibi<sup>a,b\*</sup>, Turki Alotaibi<sup>a</sup>, Majed Alshammari<sup>a</sup>, Ali K.  
Ismael<sup>a\*</sup>**

<sup>a</sup>Department of Physics, Lancaster University, Lancaster LA1 4YB, UK.

<sup>b</sup>Department of Physics, College of Science and Humanities in Al-Kharj,  
Prince Sattam bin Abdulaziz University, Al-Kharj 11942, Saudi Arabia.

**\* Correspondence: [mot.alotaibi@psau.edu.sa](mailto:mot.alotaibi@psau.edu.sa)**

# 1. Bond lengths and charge distributions of isolated systems.

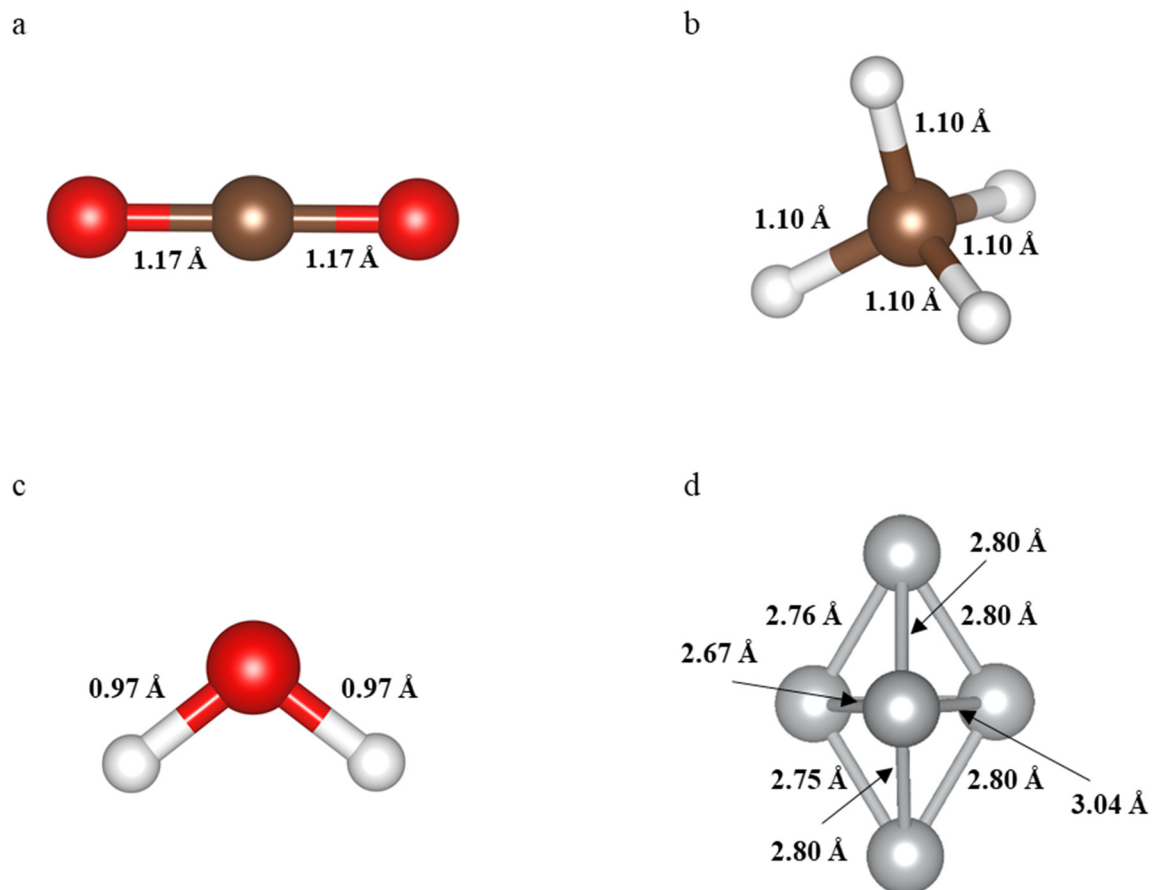

**Fig. S1.** Optimised structures of isolated (a) CO<sub>2</sub>, (b) CH<sub>4</sub>, (c) H<sub>2</sub>O, and (d) Ag<sub>5</sub> systems. Note: numbers indicate bond length values.

**Table S1.** Charge distribution of CO<sub>2</sub> molecule.

| Symbol         | Charge   $e^-$ |
|----------------|----------------|
| C              | 2.02           |
| O <sub>1</sub> | -1.01          |
| O <sub>2</sub> | -1.01          |

**Table S2.** Charge distribution of CH<sub>4</sub> structure.

| Symbol | Charge   $e^-$ |
|--------|----------------|
|--------|----------------|

|                |       |
|----------------|-------|
| C              | -0.53 |
| H <sub>1</sub> | 0.15  |
| H <sub>2</sub> | 0.10  |
| H <sub>3</sub> | 0.15  |
| H <sub>4</sub> | 0.13  |

**Table S3.** Charge distribution of H<sub>2</sub>O molecule.

| Symbol         | Charge   $e^-$ |
|----------------|----------------|
| H <sub>1</sub> | 0.99           |
| H <sub>2</sub> | 0.99           |
| O              | -1.997         |

**Table S4.** Charge distribution of Ag<sub>5</sub> structure.

| Symbol          | Charge   $e^-$ |
|-----------------|----------------|
| Ag <sub>1</sub> | 0.05           |
| Ag <sub>2</sub> | 0.18           |
| Ag <sub>3</sub> | -0.13          |
| Ag <sub>4</sub> | 0.047          |
| Ag <sub>5</sub> | -0.13          |

## 2. Density of states of isolated Systems

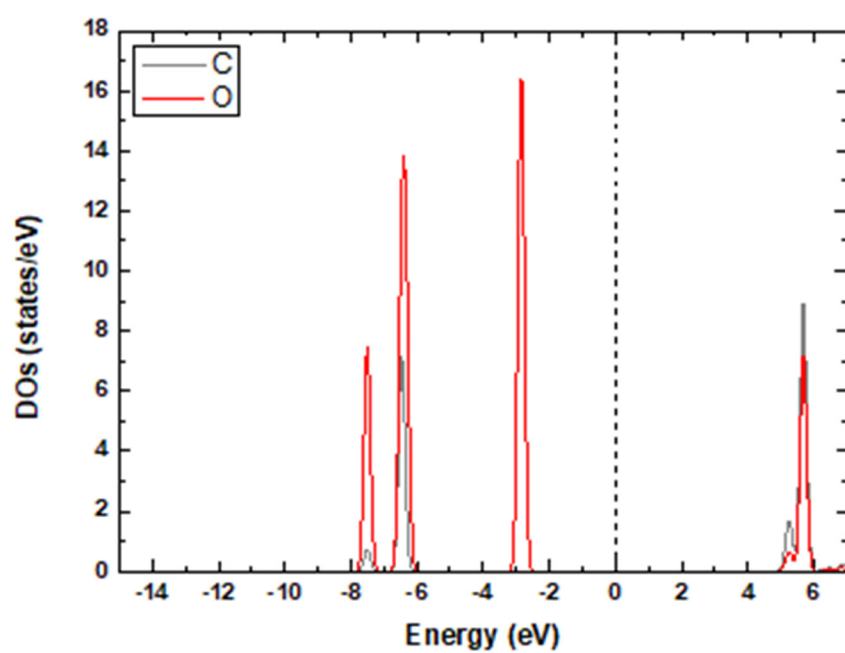

**Fig. S2.** Density of states of isolated CO<sub>2</sub> molecule.

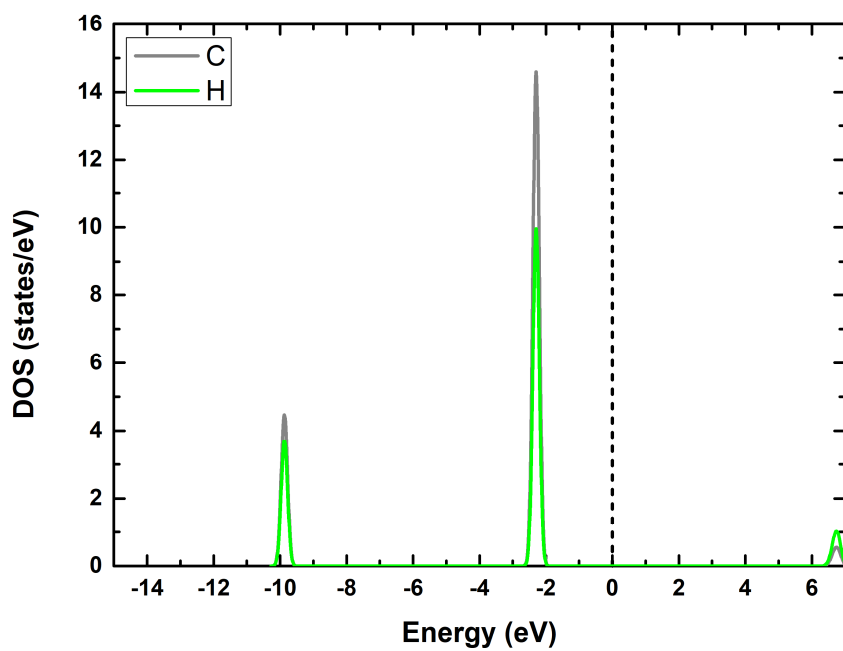

**Fig. S3.** Density of states of isolated CH<sub>4</sub> molecule.

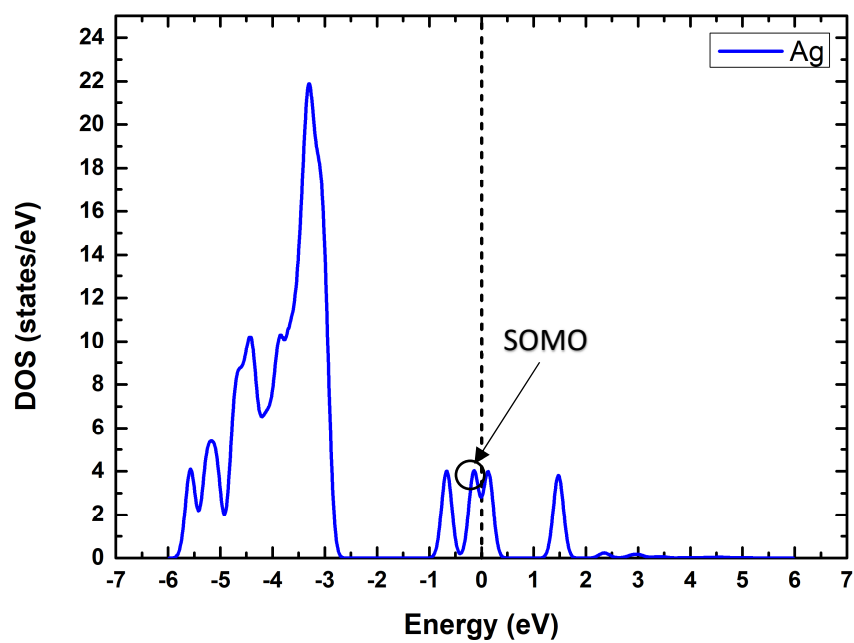

**Fig. S4** Density of states of bare Ags cluster. SOMO: singly occupied molecular orbital.

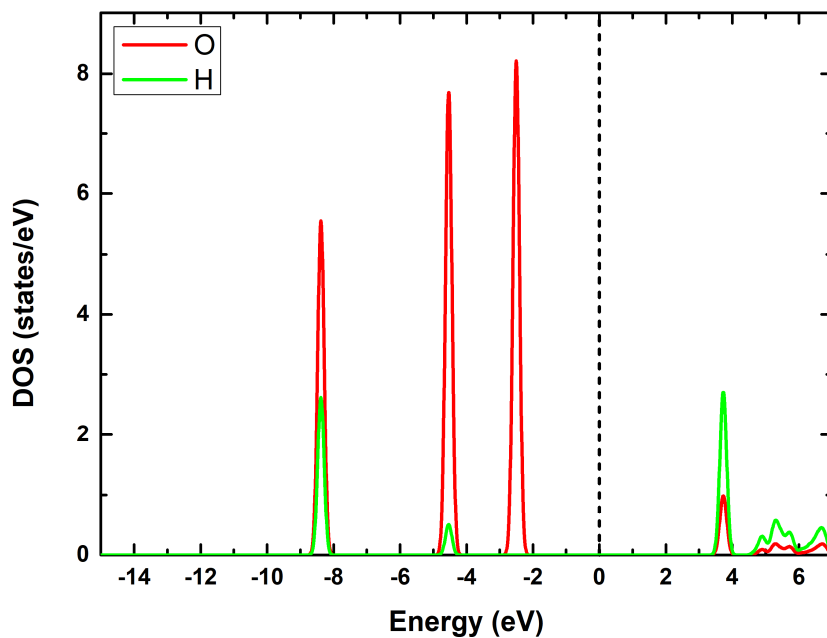

**Fig. S5** Density of states of isolated H<sub>2</sub>O molecule.

### 3. Charge distributions of CO<sub>2</sub>@Ag<sub>5</sub>, H<sub>2</sub>O@Ag<sub>5</sub>, and CH<sub>4</sub>@Ag<sub>5</sub> systems

**Table S5.** Charge distribution of CO<sub>2</sub>@Ag<sub>5</sub> structure.

| Symbol          | Charge   $e^-$ |
|-----------------|----------------|
| Ag <sub>1</sub> | 0.0417         |
| Ag <sub>2</sub> | -0.0034        |
| Ag <sub>3</sub> | -0.1306        |
| Ag <sub>4</sub> | 0.2442         |
| Ag <sub>5</sub> | -0.1479        |
| C               | 2.1541         |
| O <sub>1</sub>  | -1.046         |
| O <sub>2</sub>  | -1.116         |

**Table S6.** Charge distribution of CH<sub>4</sub>@Ag<sub>5</sub> structure.

| Symbol          | Charge   $e^-$ |
|-----------------|----------------|
| Ag <sub>1</sub> | 0.0083         |
| Ag <sub>2</sub> | -0.0716        |
| Ag <sub>3</sub> | 0.1107         |
| Ag <sub>4</sub> | -0.0684        |
| Ag <sub>5</sub> | 0.0402         |
| C               | -0.378         |
| H <sub>1</sub>  | 0.0749         |
| H <sub>2</sub>  | 0.1596         |
| H <sub>3</sub>  | 0.043          |
| H <sub>4</sub>  | 0.081          |

**Table S7.** Charge distribution of H<sub>2</sub>O@Ag<sub>5</sub> structure.

| Symbol          | Charge   $e^-$ |
|-----------------|----------------|
| Ag <sub>1</sub> | -0.0202        |
| Ag <sub>2</sub> | 0.2524         |
| Ag <sub>3</sub> | -0.1524        |
| Ag <sub>4</sub> | 0.0130         |
| Ag <sub>5</sub> | -0.1631        |
| O               | -1.9245        |

|                |       |
|----------------|-------|
| H <sub>1</sub> | 0.997 |
| H <sub>2</sub> | 0.977 |

#### 4. CO<sub>2</sub>@Ag<sub>5</sub>, CH<sub>4</sub>@Ag<sub>5</sub>, and H<sub>2</sub>O@Ag<sub>5</sub>

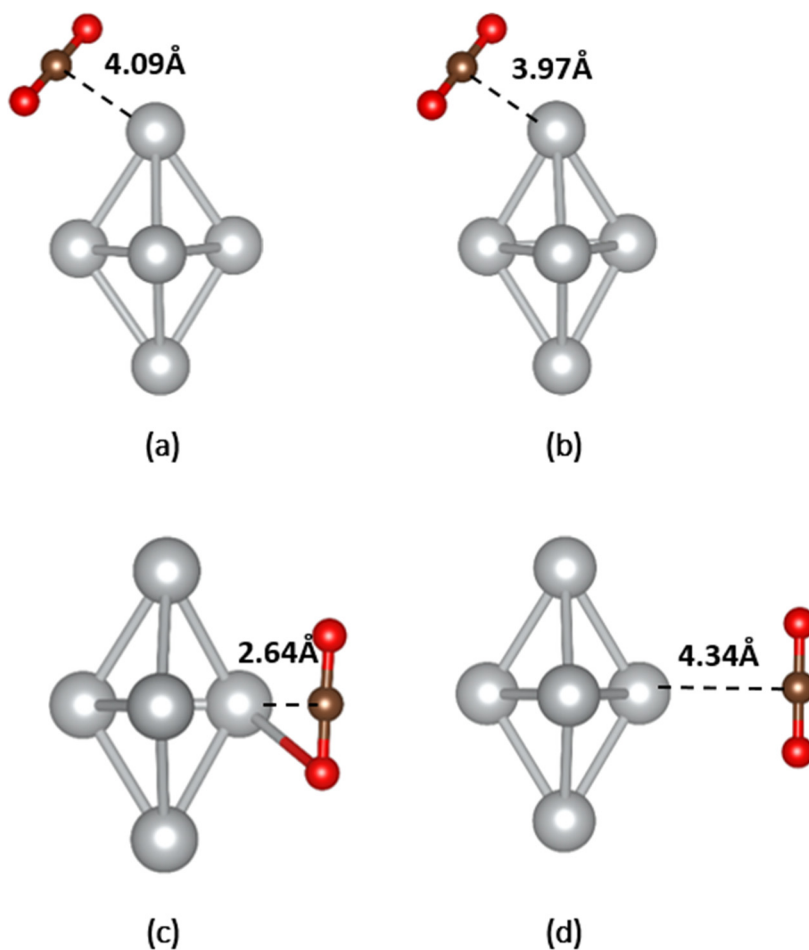

**Fig. S6** Different adsorption sites of CO<sub>2</sub>@Ag<sub>5</sub>.

**Table S8.** Total energy of the structures presented in Fig. S6 and Fig. 1.

| Structure                        | Total energy (Ry) |
|----------------------------------|-------------------|
| Fig. (b)                         | -442.847          |
| Fig. (d)                         | -442.845          |
| Fig. 1b (in the main manuscript) | -442.85           |

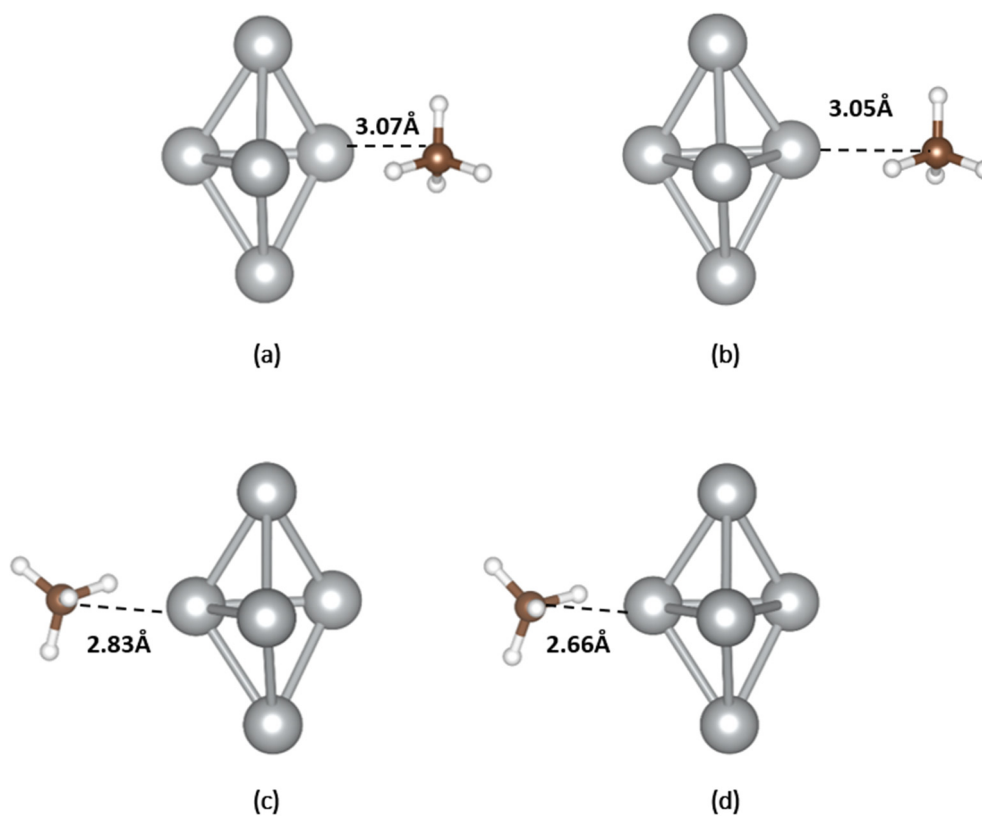

**Fig. S7** Different adsorption sites of  $\text{CH}_4@\text{Ag}_5$ .

**Table S9.** Total energy of the structures presented in Fig. S7 and Fig. 3.

| Structure                        | Total energy (Ry) |
|----------------------------------|-------------------|
| Fig. (b)                         | -383.83           |
| Fig. (d)                         | -383.84           |
| Fig. 3b (in the main manuscript) | -383.86           |



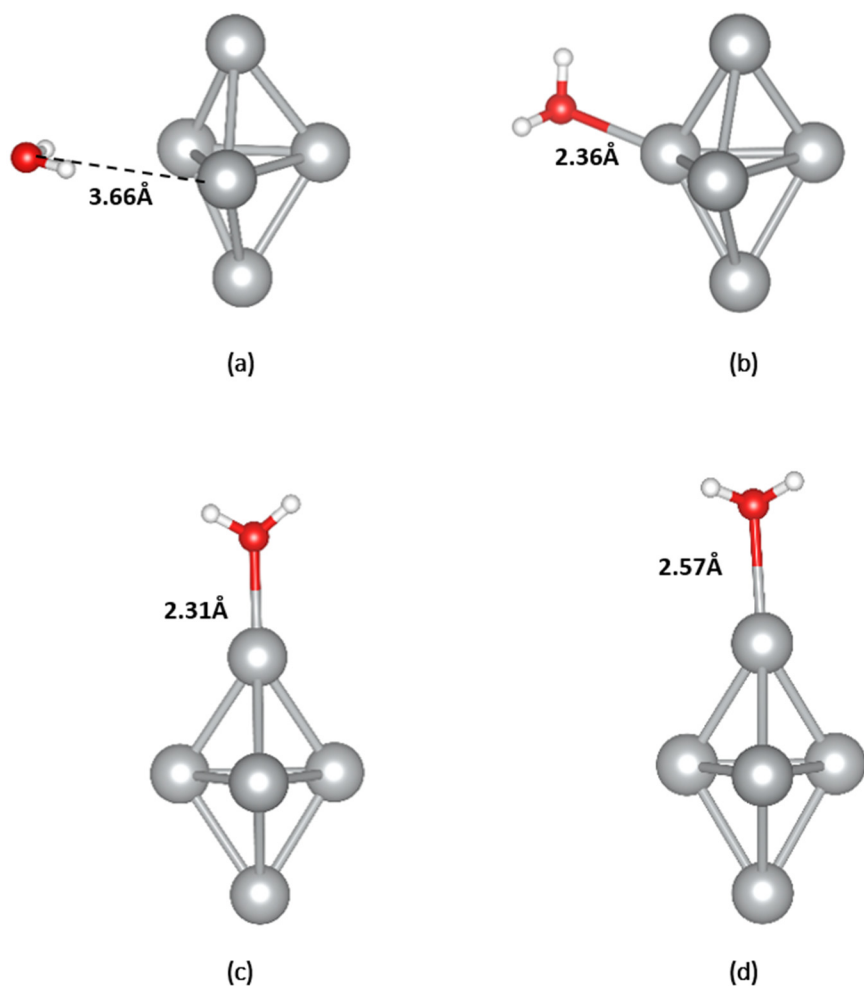

**Fig. S8** Different adsorption sites of  $\text{H}_2\text{O}@\text{Ag}_5$ .

**Table S10.** Total energy of the structures presented in Fig. S8 and Fig. 5.

| Structure                        | Total energy (Ry) |
|----------------------------------|-------------------|
| Fig. (b)                         | -401.97           |
| Fig. (d)                         | -401.95           |
| Fig. 5b (in the main manuscript) | -401.97           |

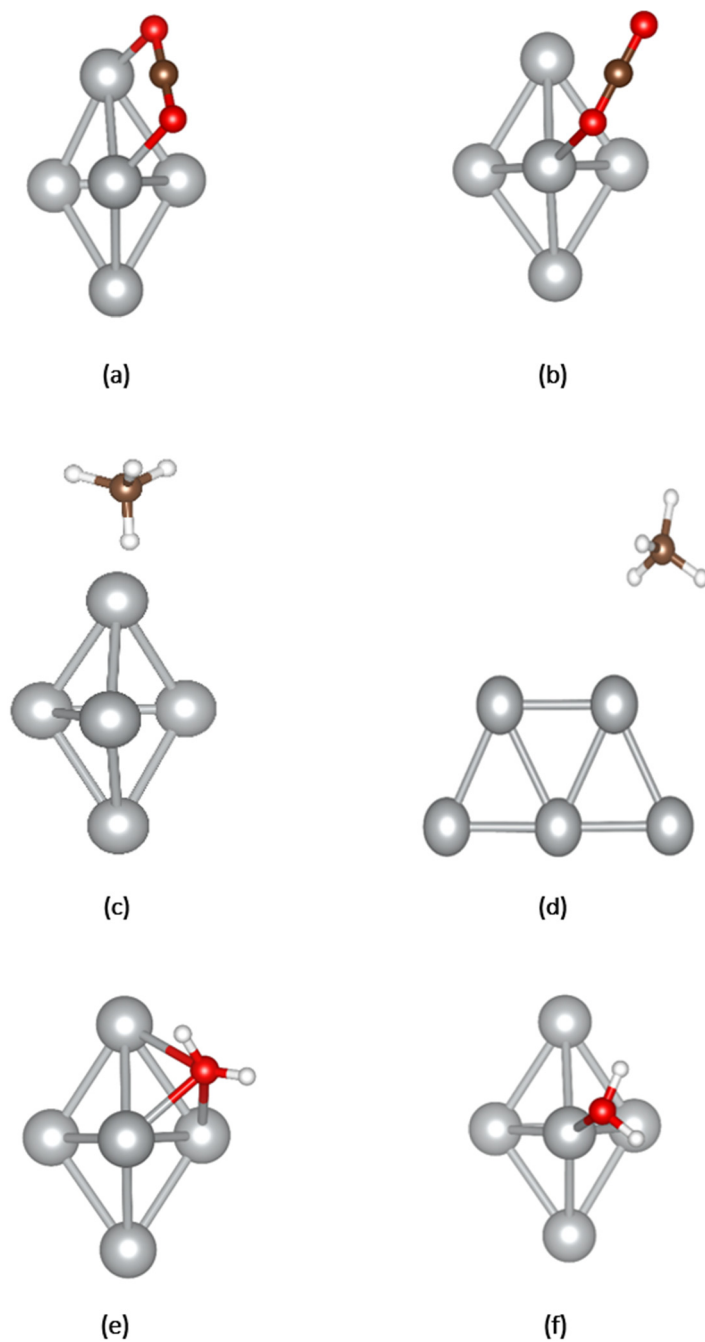

**Fig. S9** Initial (a), (c), and (e) and optimised (b), (d), and (f) structures of CO<sub>2</sub>@Ag<sub>5</sub>, CH<sub>4</sub>@Ag<sub>5</sub>, and H<sub>2</sub>O@Ag<sub>5</sub>, respectively using a cut-off energy value of 50 Ry.

## 5. Coordinates for structures appeared in the main manuscript (i.e. most stable configurations)

#### 4.1 CO<sub>2</sub>

|   |             |             |             |
|---|-------------|-------------|-------------|
| C | 6.190970003 | 5.007840246 | 5.000000000 |
| O | 5.019143545 | 5.015333639 | 5.000000000 |
| O | 7.362808452 | 4.999711115 | 5.000000000 |

#### 4.2 CH<sub>4</sub>

|   |             |             |             |
|---|-------------|-------------|-------------|
| C | 5.802491596 | 5.813692074 | 5.794837750 |
| H | 6.299387533 | 5.156933492 | 6.518220475 |
| H | 6.469649758 | 5.990568297 | 4.943277625 |
| H | 4.879524577 | 5.338058317 | 5.443318636 |
| H | 5.561130537 | 6.769328819 | 6.274534514 |

#### 4.3 H<sub>2</sub>O

|   |             |             |             |
|---|-------------|-------------|-------------|
| O | 5.711105283 | 5.071112939 | 5.522269943 |
| H | 4.875344723 | 5.209916216 | 5.041195636 |
| H | 5.691178994 | 5.734104844 | 6.235838421 |

#### 4.4 Ag<sub>5</sub>

|    |               |               |               |
|----|---------------|---------------|---------------|
| Ag | 14.9398786494 | 15.1589231789 | 10.2601349678 |
| Ag | 13.7898089800 | 17.5695921120 | 10.3584394046 |
| Ag | 15.1094581004 | 16.8618035090 | 8.0413882405  |
| Ag | 16.4541157247 | 17.8012599369 | 10.3117668660 |
| Ag | 15.2025185485 | 16.7230812631 | 12.5730605220 |

#### 4.5 CO<sub>2</sub>@Ag<sub>5</sub>

|    |             |             |             |
|----|-------------|-------------|-------------|
| Ag | 6.611341632 | 4.682388766 | 6.658463874 |
| Ag | 4.507929647 | 6.783250783 | 7.167060581 |
| Ag | 6.137569213 | 6.835171078 | 4.885220170 |

|    |             |             |              |
|----|-------------|-------------|--------------|
| Ag | 7.193440756 | 7.174856844 | 7.422062672  |
| Ag | 5.876375881 | 5.495312606 | 9.250320223  |
| C  | 7.368147269 | 9.098659050 | 10.042701401 |
| O  | 6.847236473 | 9.140026890 | 11.085669433 |
| O  | 7.908287129 | 9.073307983 | 8.995476646  |

#### 4.6 CH<sub>4</sub>@Ag<sub>5</sub>

|    |             |             |              |
|----|-------------|-------------|--------------|
| Ag | 5.626397269 | 5.156450229 | 7.023635238  |
| Ag | 4.176794751 | 5.822571492 | 4.819498174  |
| Ag | 6.317047542 | 7.341193871 | 5.469859884  |
| Ag | 8.471872477 | 8.827740067 | 6.142919080  |
| Ag | 7.817992273 | 6.701337028 | 7.706950766  |
| C  | 8.012733686 | 6.782678557 | 11.247270388 |
| H  | 8.733252916 | 7.564848022 | 10.977937575 |
| H  | 7.011402477 | 7.069474840 | 10.902016927 |
| H  | 8.000014388 | 6.657478997 | 12.337492538 |
| H  | 8.303465222 | 5.833600897 | 10.778214430 |

#### 4.7 H<sub>2</sub>O@Ag<sub>5</sub>

|    |             |             |             |
|----|-------------|-------------|-------------|
| Ag | 9.324361659 | 4.961668275 | 6.427752826 |
| Ag | 7.367543392 | 6.725200727 | 7.124589535 |
| Ag | 8.166178632 | 6.568329727 | 4.452494653 |
| Ag | 9.659301642 | 7.921653786 | 6.415879475 |
| Ag | 9.626557176 | 6.430647613 | 8.786407035 |
| O  | 5.249911599 | 6.401403325 | 8.111018921 |
| H  | 4.765323763 | 5.685702419 | 7.658773906 |
| H  | 5.400919136 | 6.086222127 | 9.021768649 |
